# Supplementary material for: Nephrocystin-1 and nephrocystin-4 are required for epithelial morphogenesis and associate with PALS1/PATJ and Par6
Source: PubMed Central journal article supplement — Hum Mol Genet. 2009 Sep 14;18(24):4711–23. doi: 10.1093/hmg/ddp434 (PMC2778369; doi:10.1093/hmg/ddp434), 2009-09-14
Supplement: ddp434_1.pdf [file ddp434_1.pdf]

**Supplementary Table: Oligonucleotide primers for real-time RT- PCR.**

| <b>Gene</b>           | <b>Specie</b> | <b>Forward</b>             | <b>Reverse</b>           |
|-----------------------|---------------|----------------------------|--------------------------|
| <i>NPHP1</i>          | canine        | AGCAGGAGGGGAAGAAGT         | TGGAAGAGTGTGGAAGGC       |
| <i>INVS/NPHP2</i>     | canine        | CATGAAGTGATCCAGTTCATGTTG   | GGCGGCGATGTCCTGTAT       |
| <i>NPHP3</i>          | canine        | TCTCTGTGGAGTAACGCTGTCA     | ATCCCATTGTCTCACACATTC    |
| <i>NPHP4</i>          | canine        | ATAGTTCGCTGGGCTGTT         | CTGGCAGGGGTACTTTA        |
| <i>NPHP4</i>          | human         | CCGTGTACCTTGGAAGT          | CCACAGTCAGGCAGAGCA       |
| <i>CEP290/NPHP6</i>   | canine        | ATGGAGCGACAGCTTAGGAA       | TAAATCGTTGCAAACGTCCA     |
| <i>GLIS2/NPHP7</i>    | canine        | GCCAAGTGTAACCAGCTCTTTGA    | CCCTCCCAGTGACAGCAGTAC    |
| <i>RPGRIP1L/NPHP8</i> | canine        | TTGAAGCAGTGACCCAGAAGA      | TGGTGCCATAGGCAATATCCT    |
| <i>NEK8/NPHP9</i>     | canine        | GGTGCCTTCGGGATTGTG         | CCACTGGGATCTGCTTGATGA    |
| <i>PCNT2</i>          | canine        | AGGCTTCAGGAAAGCTCTGATTTATC | GTGGTCGTCTTCTTATCAGCTTTG |
| <i>NIN</i>            | canine        | CCATCTGCATCTACGCCATACA     | CGAAAGCCAATGGTACTTGTC    |
| <i>PKHD1</i>          | canine        | TGAAATACACTCAGGTGTCTCT     | CAGGCATCTCATGAATAAACC    |
| <i>IFT88</i>          | canine        | GATGGGAAGACCAATGACAGGG     | TCAAATGCAGAGCCTCTCAA     |
| <i>GAPDH</i>          | canine        | AAGGTAGTGAAGCAGGCA         | GGTGGAAGAGTGGGTGTC       |

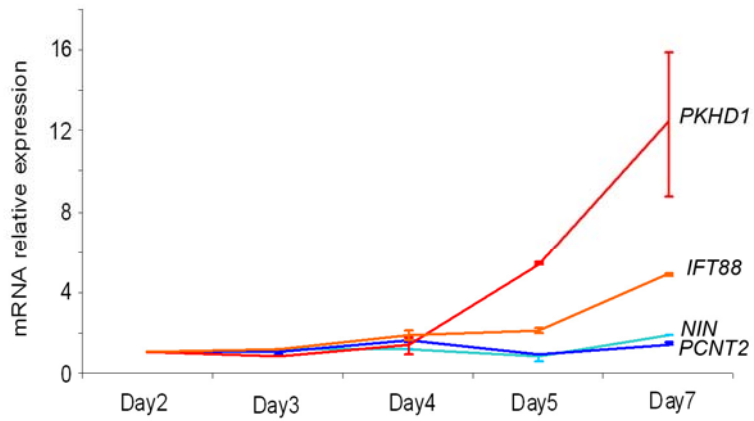

**Suppl. Figure 1: Expression analysis of centrosomal and ciliary genes during cell polarization.** Quantitative RT-PCR analysis of centrosomal genes (*NIN*, encoding ninein and *PCNT2*, pericentrin) and ciliary genes (*PKHD1* and *IFT88*) during time-course experiments performed on MDCK cells.

A

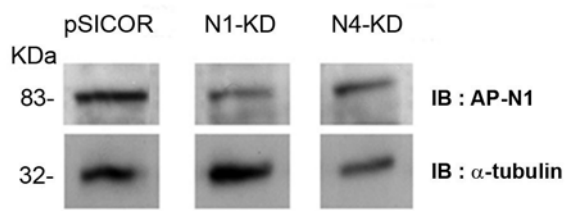

B

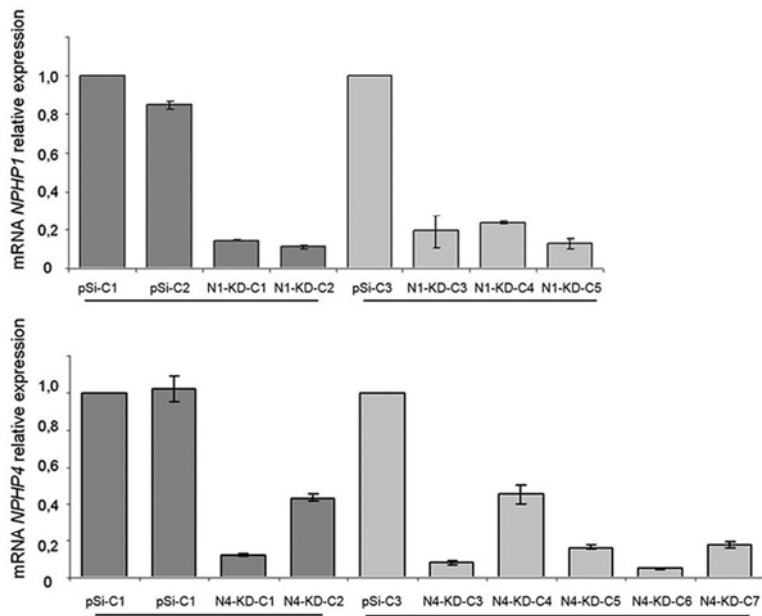

**Suppl. Figure 2: Analysis of *NPHP1* and *NPHP4* expression in polyclonal and clonal knockdown cell lines. (A) Western blot analysis of nephrocystin-1 expression level in polyclonal control pSICOR, N1-KD and N4-KD cell lines. (B) Quantitative RT-PCR analysis of *NPHP1* and *NPHP4* gene expression in control (pSi-C1 to 3), *NPHP1* knockdown (N1-KD-C1 to 5) and *NPHP4* knockdown (N4-KD-C1 to 7) clones, respectively. As clones were selected in two independent experiments, the clones which are compared are underlined.**

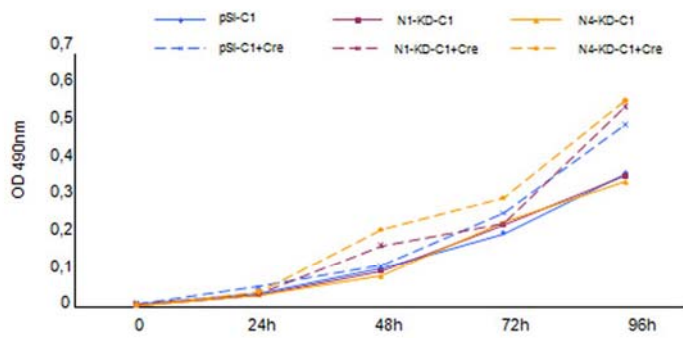

**Suppl. Figure 3: NPHP knockdown cells have no defect in cell proliferation.** Control and NPHP-depleted cells ( $5 \cdot 10^3$  cells), before and after Cre infection, were seeded in triplicate in 96-well plates. At each time point, number of cells was quantified using CellTiter 96® Aqueous Cell Proliferation Reagent (Promega) following the manufacturer's instructions and OD490nm was measured using a spectrophotometer microplate reader (Thermolab systems).

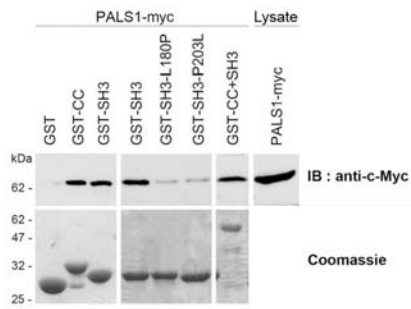

**Suppl. Figure 4: Nephrocystin-1 interacts with PALS1 via its coiled-coil and SH3 domains.** *In vitro* pull down assay of PALS1-myc expressed transiently in HEK293T using GST fusion protein of the CC (GST-CC) and SH3 domains (GST-SH3) of nephrocystin-1 and GST alone. Bound protein was revealed with anti-c-Myc antibody and coomassie staining revealed the amount of GST fusion proteins used.

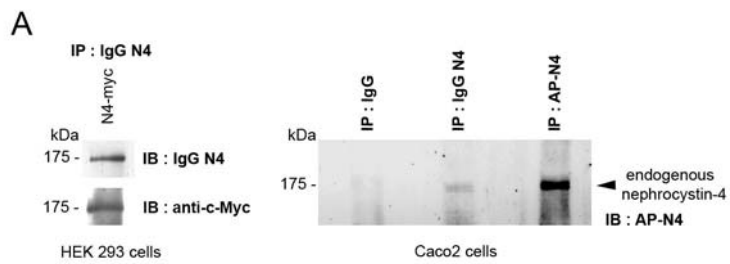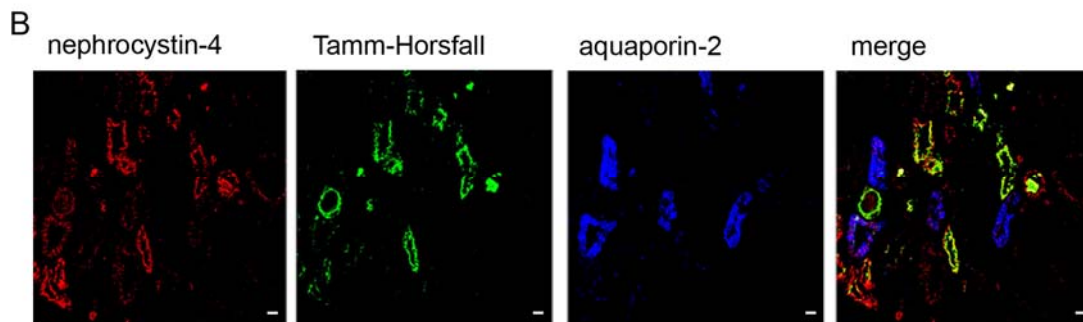

**Suppl. Figure 5: Characterization of the mouse monoclonal anti-nephrocystin-4 antibody.** (A) Immunoprecipitation of overexpressed (N4-myc, left panel) or endogenous nephrocystin-4 (right panel) protein with mouse monoclonal (IgG N4) or rabbit polyclonal (AP-N4) anti-nephrocystin-4 antibody in HEK293 cells and caco2 cells, respectively. (B) Co-labelling of human kidney section with IgG N4, anti-Tamm-Horsfall (Argen) (thick ascending loop of Henle and distal tubules) and anti-aquaporin2 (Santa Cruz) (collecting ducts) antibodies. Scale bars are 20 $\mu$ m.
